# Supplementary material for: N,S co-doped hierarchically porous carbon materials for efficient metal-free catalysis
Source: Royal Society of Chemistry journal article supplement (doi:10.1039/c9gc03863a), 2019-12-19
Supplement: c9gc03863a1.pdf [file c9gc03863a1.pdf]

## **N, S co-doped hierarchically porous carbon materials for efficient metal-free catalysis**

Xiwei Hu,<sup>a</sup> Xun Sun,<sup>b</sup> Qiang Song,<sup>a</sup> Yangyang Zhu,<sup>a</sup> Yu Long<sup>a\*</sup> and Zhengping Dong<sup>a\*</sup>

<sup>a</sup> State Key Laboratory of Applied Organic Chemistry, Laboratory of Special Function Materials and Structure Design of the Ministry of Education, Gansu Provincial Engineering Laboratory for Chemical Catalysis, College of Chemistry and Chemical Engineering, Lanzhou University, Lanzhou 730000, PR China

<sup>b</sup> Shandong Applied Research Center of Gold Nanotechnology (Au-SDARC), School of Chemistry & Chemical Engineering, Yantai University, Yantai 264005, PR China

E-mail address: sunxun@ytu.edu.cn (Xun Sun), longyu@lzu.edu.cn (Yu Long), dongzhp@lzu.edu.cn (Zhengping Dong), Tel: 86 931 8912577.

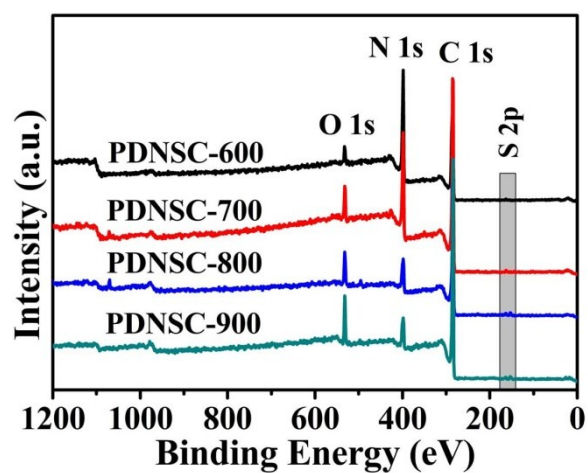

**Fig. S1.** The wide scan spectra of PDNSC-600, PDNSC-700, PDNSC-800 and PDNSC-900 catalysts.

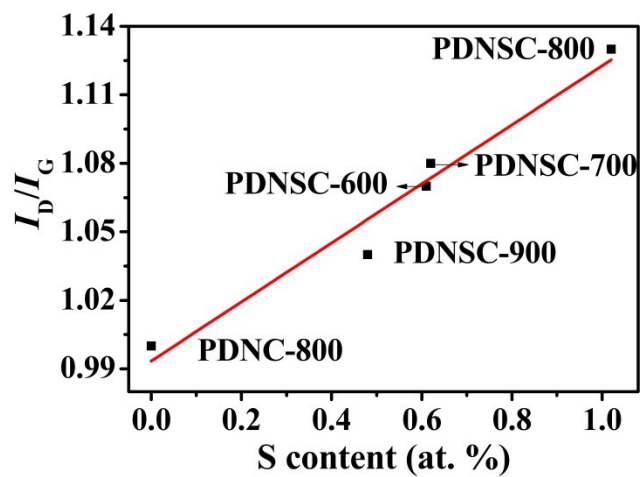

**Fig. S2.** Linear correlation between the S doping concentration and the values of  $I_D/I_G$  in PDNSC-X catalysts.

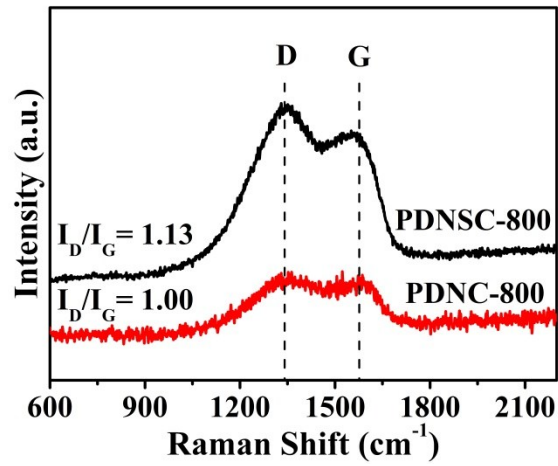

**Fig. S3.** The comparison between PDNC-800 and PDNSC-800 catalyst in Raman spectra.

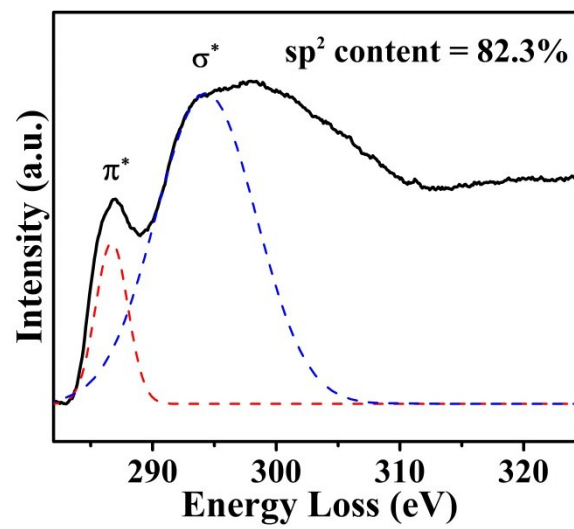

**Fig. S4.** The EELS C K-edges spectrum of PDNSC-800 catalyst.

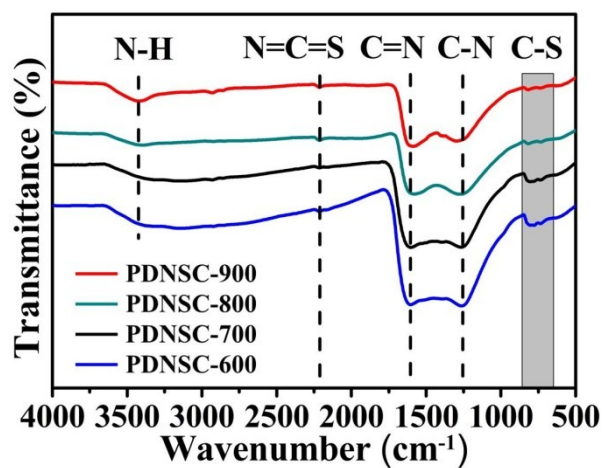

**Fig. S5.** The FT-IR spectra of PDNSC-600, PDNSC-700, PDNSC-800 and PDNSC-900 catalysts.

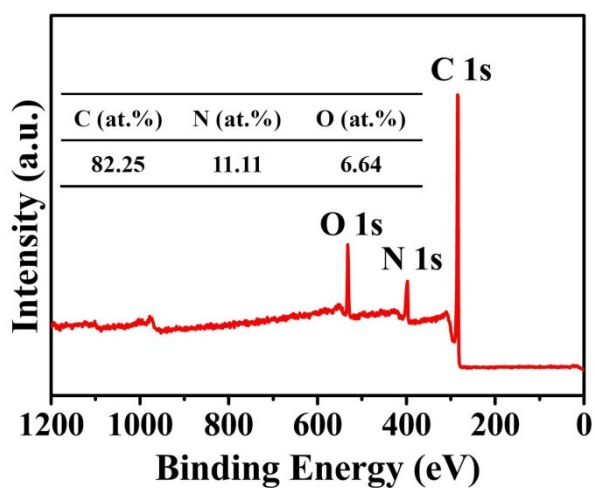

**Fig. S6.** The wide scan spectra and element contents of PDNC-800 catalyst.

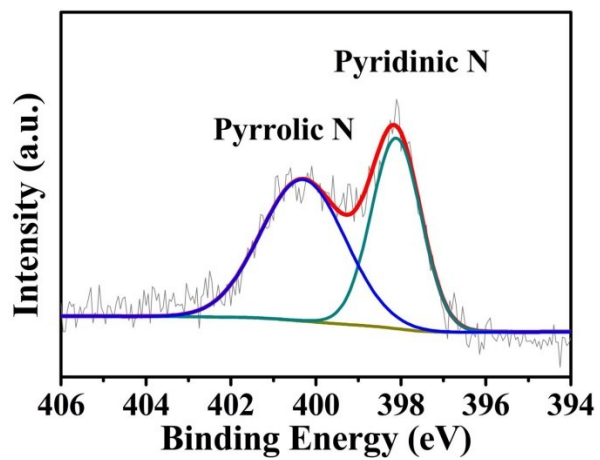

Fig. S7. The N 1s spectra of PDNC-800 catalyst.

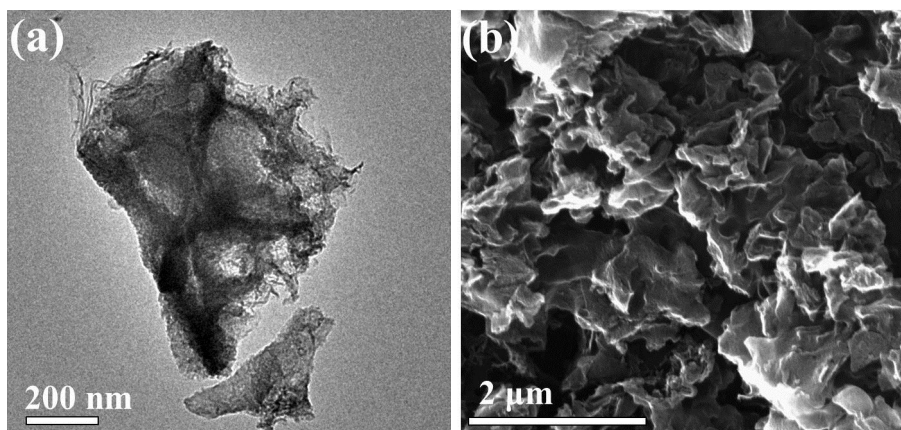

Fig. S8. The TEM image (a) and SEM image (b) of reused PDNSC-800 catalysts.

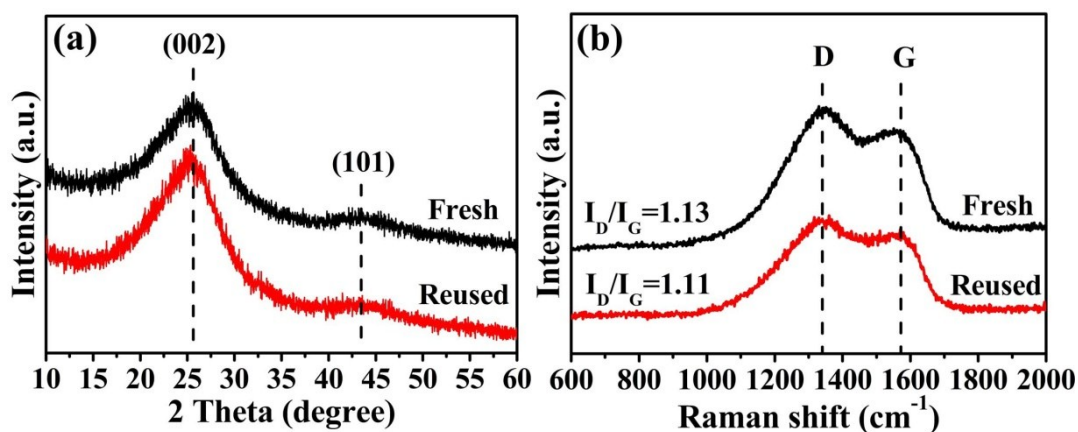

Fig. S9. The comparison between fresh and reused PDNSC-800 catalyst in PXRD patterns (a) and Raman spectra (b).

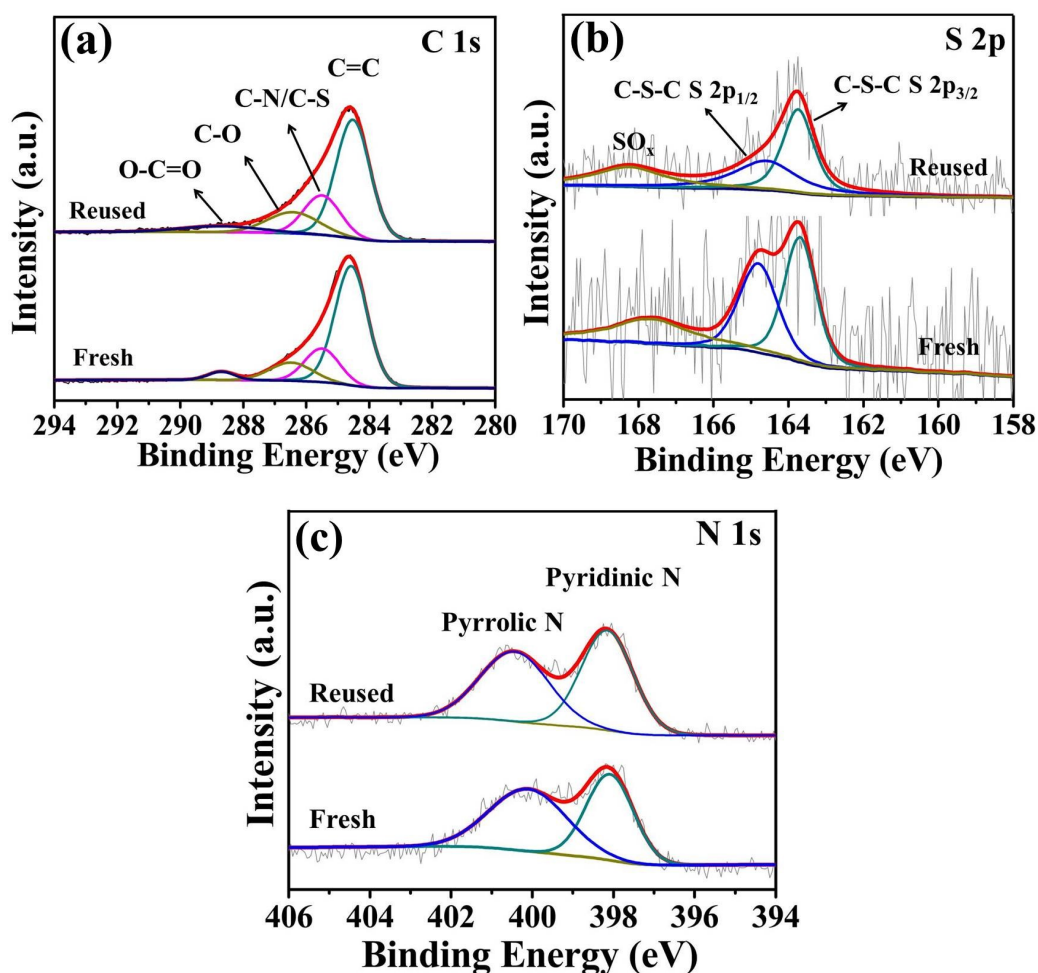

Fig. S10. The comparison between fresh and reused PDNSC-800 catalyst in C 1s spectra (a), S 2p spectra (b) and N 1s spectra (c).

**Table S1.** Texture parameters of prepared PDNSC-X catalysts and the comparison of catalytic performance in reduction of nitrobenzene.

| Entry | Samples   | BET surface area (m <sup>2</sup> g <sup>-1</sup> ) | Pore volume (cm <sup>3</sup> g <sup>-1</sup> ) | Average pore size (nm) | TOF (mol·g <sup>-1</sup> h <sup>-1</sup> ) |
|-------|-----------|----------------------------------------------------|------------------------------------------------|------------------------|--------------------------------------------|
| 1     | PDNSC-600 | 18.6                                               | 0.030                                          | 13.8                   | 2.60×10 <sup>-3</sup>                      |
| 2     | PDNSC-700 | 211.9                                              | 0.18                                           | 3.4                    | 9.05×10 <sup>-3</sup>                      |
| 3     | PDNSC-800 | 351.3                                              | 0.32                                           | 3.7                    | 1.67×10 <sup>-2</sup>                      |
| 4     | PDNSC-900 | 495.7                                              | 0.38                                           | 3.0                    | 1.63×10 <sup>-2</sup>                      |

**Table S2.** The comparison of catalytic activity of PDNSC-800 catalyst with other reported catalysts in reduction of nitrobenzene.

| Entry | Catalyst/mg   | N <sub>2</sub> H <sub>4</sub> (mmol) | Temp. (°C) | Time (h) | TOF (mol·g <sup>-1</sup> h <sup>-1</sup> ) | Ref.      |
|-------|---------------|--------------------------------------|------------|----------|--------------------------------------------|-----------|
| 1     | NC-700/40     | 5                                    | 100        | 3.5      | 3.57×10 <sup>-3</sup>                      | [1]       |
| 2     | BNC/10        | 10                                   | 100        | 8        | 1.23×10 <sup>-2</sup>                      | [2]       |
| 3     | BN-HCS-800/10 | 17.5                                 | 100        | 1        | 2.50×10 <sup>-2</sup>                      | [3]       |
| 4     | PDNSC-800/30  | 8.7                                  | 100        | 0.6      | 2.78×10 <sup>-2</sup>                      | This work |

**Table S3.** The reduction of different substituted nitroarenes catalyzed by PDNC-800 catalyst under the optimal conditions.<sup>a</sup>

| Entry | Substrate                                                                         | Product                                                                           | Time (h) | Conv./ Sel. (%) <sup>b</sup> | TOF (mol·g <sup>-1</sup> h <sup>-1</sup> ) |
|-------|-----------------------------------------------------------------------------------|-----------------------------------------------------------------------------------|----------|------------------------------|--------------------------------------------|
| 1     | 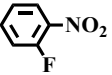 |  | 0.5      | 43.8/97.9                    | 1.51×10 <sup>-2</sup>                      |
| 2     |  |  | 1        | 57.5/>99                     | 1.61×10 <sup>-2</sup>                      |
| 3     |  |  | 1        | 37.9/98.3                    | 1.65×10 <sup>-2</sup>                      |
| 4     |  |  | 1.5      | 55.4/>99                     | 1.10×10 <sup>-2</sup>                      |
| 5     |  |  | 1.5      | 50.3/>99                     | 1.11×10 <sup>-2</sup>                      |
| 6     |  |  | 2        | 37.1/97.2                    | 7.99×10 <sup>-3</sup>                      |

<sup>a</sup> Reaction conditions: 0.5 mmol substrate, 30 mg PDNC-800 catalyst, 3 mL of ethanol, 500 μL N<sub>2</sub>H<sub>4</sub>·H<sub>2</sub>O, 90 °C.

**Table S4.** The reduction of different substituted nitroarenes catalyzed by SC-800 catalyst under the optimal conditions.<sup>a</sup>

| Entry | Substrate                                                                           | Product                                                                             | Time (h) | Conv./ Sel. (%) <sup>b</sup> | TOF (mol·g <sup>-1</sup> h <sup>-1</sup> ) |
|-------|-------------------------------------------------------------------------------------|-------------------------------------------------------------------------------------|----------|------------------------------|--------------------------------------------|
| 1     | 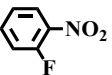 |  | 0.5      | 90.3/94.6                    | 1.51×10 <sup>-2</sup>                      |
| 2     |  |  | 1        | 97.1/93.3                    | 1.61×10 <sup>-2</sup>                      |
| 3     |  |  | 1        | 96.8/92.9                    | 1.65×10 <sup>-2</sup>                      |
| 4     |  |  | 1.5      | 94.5/91.8                    | 1.10×10 <sup>-2</sup>                      |
| 5     |  |  | 1.5      | 95.3/92.5                    | 1.11×10 <sup>-2</sup>                      |
| 6     |  |  | 2        | 92.7/91.0                    | 7.99×10 <sup>-3</sup>                      |

<sup>a</sup> Reaction conditions: 0.5 mmol substrate, 30 mg SC-800 catalyst, 3 mL of ethanol, 500 μL N<sub>2</sub>H<sub>4</sub>·H<sub>2</sub>O, 90 °C.



**Table S5.** The comparison of element contents in fresh and reused PDNSC-800 catalysts.

| Catalyst         | C (at.%) | N (at.%) | S (at.%) | O (at.%) |
|------------------|----------|----------|----------|----------|
| Fresh PDNSC-800  | 71.98    | 15.71    | 1.02     | 11.29    |
| Reused PDNSC-800 | 77.38    | 13.62    | 0.93     | 8.07     |

## References

- [1] X. Hu, Y. Long, M. Fan, M. Yuan, H. Zhao, J. Ma, Z. Dong, Two-dimensional covalent organic frameworks as self-template derived nitrogen-doped carbon nanosheets for eco-friendly metal-free catalysis, *Appl. Catal. B-Environ.*, 244 (2019) 25-35.
- [2] Y. Zhang, Y. Zhai, M. Chu, L. Huo, H. Wang, Y. Gao, Synergistic Effect of B and N Dopants in Catalytic Transfer Hydrogenation, *Asian J. Org. Chem.*, 7 (2018) 1107-1112.
- [3] L. Li, L. Li, C. Cui, H. Fan, R. Wang, Heteroatom-doped Carbon Spheres from Hierarchical Hollow Covalent Organic Framework Precursors for Metal-Free Catalysis, *ChemSusChem*, 10 (2017) 4921-4926.
